# Supplementary material
Source: Springer Nature journal article supplement (https://www.springermedizin.de/resource/supplementary/13023_2013_692_MOESM12_ESM.pdf/9642682)

**A**

|    | Function                                             | p-value  | # Molecules |
|----|------------------------------------------------------|----------|-------------|
| 1  | Renal and Urological System Development and Function | 1.76E-06 | 10          |
| 2  | Tissue Morphology                                    | 2.66E-06 | 12          |
| 3  | Dermatological Diseases and Conditions               | 4.37E-06 | 14          |
| 4  | Gastrointestinal Disease                             | 4.37E-06 | 21          |
| 5  | Organismal Injury and Abnormalities                  | 4.37E-06 | 11          |
| 6  | Lipid Metabolism                                     | 5.27E-06 | 17          |
| 7  | Small Molecule Biochemistry                          | 5.27E-06 | 23          |
| 8  | Cancer                                               | 5.64E-06 | 34          |
| 9  | Cellular Compromise                                  | 1.33E-05 | 8           |
| 10 | Organ Morphology                                     | 1.56E-05 | 10          |

**B**

|    | Function                                             | p-value  | # Molecules |
|----|------------------------------------------------------|----------|-------------|
| 1  | Dermatological Diseases and Conditions               | 5.52E-07 | 11          |
| 2  | Gastrointestinal Disease                             | 5.52E-07 | 15          |
| 3  | Organismal Injury and Abnormalities                  | 5.52E-07 | 9           |
| 4  | Organ Morphology                                     | 9.16E-07 | 10          |
| 5  | Renal and Urological System Development and Function | 9.16E-07 | 7           |
| 6  | Lipid Metabolism                                     | 3.68E-06 | 14          |
| 7  | Small Molecule Biochemistry                          | 3.68E-06 | 18          |
| 8  | Cell Morphology                                      | 1.07E-05 | 7           |
| 9  | Molecular Transport                                  | 1.09E-05 | 11          |
| 10 | Tissue Morphology                                    | 3.73E-05 | 8           |

**C**

|    | Function                                              | p-value  | # Molecules |
|----|-------------------------------------------------------|----------|-------------|
| 1  | Cell Morphology                                       | 1.38E-05 | 6           |
| 2  | Cellular Development                                  | 1.38E-05 | 6           |
| 3  | Connective Tissue Development and Function            | 9.32E-05 | 4           |
| 4  | Cancer                                                | 3.70E-04 | 14          |
| 5  | Cellular Movement                                     | 3.70E-04 | 4           |
| 6  | Tumor Morphology                                      | 3.70E-04 | 3           |
| 7  | Cellular Growth and Proliferation                     | 4.80E-04 | 3           |
| 8  | Skeletal and Muscular System Development and Function | 4.80E-04 | 4           |
| 9  | Cell Cycle                                            | 9.91E-04 | 1           |
| 10 | Cell Death and Survival                               | 9.91E-04 | 2           |

**D**

|   | Function                          | p-value  | # Molecules |
|---|-----------------------------------|----------|-------------|
| 1 | Lipid Metabolism                  | 5.27E-06 | 17          |
| 2 | Small Molecule Biochemistry       | 5.27E-06 | 23          |
| 3 | Cellular Compromise               | 1.33E-05 | 8           |
| 4 | Cell Morphology                   | 3.67E-05 | 11          |
| 5 | Cellular Growth and Proliferation | 9.06E-05 | 26          |

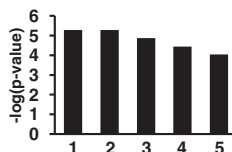**E**

|   | Function                          | p-value  | # Molecules |
|---|-----------------------------------|----------|-------------|
| 1 | Lipid Metabolism                  | 3.68E-06 | 14          |
| 2 | Small Molecule Biochemistry       | 3.68E-06 | 18          |
| 3 | Cell Morphology                   | 1.07E-05 | 7           |
| 4 | Molecular Transport               | 1.09E-05 | 11          |
| 5 | Cellular Growth and Proliferation | 4.17E-05 | 20          |

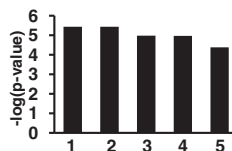

Supplement: MOESM12 [file 9642682]
